# Supplementary material
Source: PubMed Central journal article supplement (PMC1214641)
Supplement: aem_71_9_5225__1.pdf [file aem_71_9_5225__1.pdf]

**Supplemental Table A.** Differential phenotypic characteristics of *Deinococcus* species.

| Characteristic                  | <i>D. radiodurans</i> | <i>D. murrayi</i> | <i>D. geothermalis</i> <sup>a)</sup> | <i>D. indicus</i> <sup>b)</sup> | 1<br>(n=2)    | 2<br>(n=2)    | 3<br>(n=2) | 4<br>(n=2)    | 5<br>(n=2) | 6<br>(n=2) | 7<br>(n=1) | 8<br>(n=2)    | 9<br>(n=2)               |
|---------------------------------|-----------------------|-------------------|--------------------------------------|---------------------------------|---------------|---------------|------------|---------------|------------|------------|------------|---------------|--------------------------|
| Optimum growth temperature (°C) | 30                    | 47                | 47                                   | 30                              | 30            | 30            | 30         | 30            | 30         | 30         | 30         | 30            | 30                       |
| Pigmentation                    | pink-red              | orange            | orange                               | red                             | slightly pink | slightly pink | pink       | slightly pink | pink       | pink       | pink       | slightly pink | pink                     |
| Cell morphology                 | spherical             | spherical         | spherical                            | rods                            | spherical     | rods          | spherical  | spherical     | rods       | spherical  | rods       | rods          | spherical/<br>short rods |
| Cytochrome oxidase              | +                     | +                 | +                                    | -                               | +             | +             | +          | +             | +          | -/+        | +          | +             | +                        |
| Catalase                        | +                     | +                 | +                                    | +                               | -             | -             | +          | +             | +          | +          | +          | +             | +                        |
| Utilization of                  |                       |                   |                                      |                                 |               |               |            |               |            |            |            |               |                          |
| Glucose                         | +                     | +                 | +                                    | -                               | -             | -             | +          | +             | +          | +          | +          | +             | +                        |
| Fructose                        | +                     | -                 | +                                    | -                               | -             | +             | +          | +             | -/+        | +          | +          | +             | +                        |
| Mannose                         | +                     | +                 | +                                    | +                               | +/-           | +             | +          | +             | +          | +/-        | +          | +             | +                        |
| Rhamnose                        | -                     | -                 | +                                    | +                               | +             | +             | +          | +             | -          | +          | +          | +             | +                        |
| Arabinose                       | -                     | -                 | -                                    | +                               | +             | +             | +          | +             | +          | +          | -          | +             | +                        |
| Ribose                          | +                     | -                 | ND                                   | +                               | -             | -             | +          | -             | -          | +          | -          | -             | -                        |
| Xylose                          | -                     | -                 | +                                    | ND                              | -             | -             | +          | -             | -          | w          | -          | +             | +                        |
| Lactose                         | -                     | -                 | +                                    | +                               | -             | -             | -/+        | -/+           | -          | +          | -          | +/-           | +                        |
| Trehalose                       | +                     | +                 | +                                    | ND                              | -             | +             | +          | +             | +          | +          | +          | +             | +                        |
| Melibiose                       | -                     | -                 | -                                    | +                               | -             | -             | -          | -             | -          | -          | -          | -             | +                        |
| Glucosamine                     | +                     | -                 | ND                                   | ND                              | -             | -             | +          | -             | +          | +          | +          | +             | +                        |
| Glycerol                        | +                     | -                 | +                                    | ND                              | -             | -             | -/+        | -             | +          | w          | -          | -             | +                        |
| α-cetoglutarate                 | -                     | -                 | ND                                   | ND                              | -             | -             | -          | -             | -          | -          | -          | -             | +                        |
| Lactate                         | +                     | -                 | ND                                   | ND                              | -             | -             | -          | -             | -          | -          | +          | -             | -                        |
| Malate                          | +                     | w                 | +                                    | ND                              | +             | +             | -          | -             | +          | -          | -          | +/-           | -                        |
| Ornithine                       | -                     | -                 | ND                                   | ND                              | +             | +             | +          | -             | +          | w          | -          | +             | +                        |
| Aspartate                       | +                     | +                 | ND                                   | +                               | -             | -             | -          | -             | +          | -          | -          | -             | -                        |
| Glutamate                       | +                     | +                 | +                                    | ND                              | +             | +             | -          | -             | +          | w          | -          | +             | -                        |
| Alanine                         | -                     | -                 | ND                                   | -                               | -             | -             | -          | -             | -          | w          | -          | +             | -                        |
| Asparagine                      | -                     | -                 | +                                    | ND                              | +/-           | -             | -          | -             | +          | w          | -          | -             | -                        |
| Glutamine                       | +                     | +                 | +                                    | ND                              | +             | -             | +          | -             | +          | w          | w          | +             | w                        |
| Glycine                         | w                     | +                 | ND                                   | -                               | -             | w             | -          | -             | -          | -          | -          | -             | -                        |
| G+C content (mol %)             | 67.0                  | 69.9              | 65.9                                 | 65.8                            | 67.9          | 66.4          | 66.2       | 68.5          | 71.1       | 71.5       | 66.1       | 69.0          | 70.3                     |

1-9, *Deinococcus* new species; n, number of strains; +, positive result or growth; -, negative result or growth; w, weak growth; ND, not determined.

<sup>a)</sup>, data from Ferreira *et al.* (19); <sup>b)</sup>, data from Suresh *et al.* (61)

Galactose, maltose, sucrose, cellobiose and proline were assimilated by all of the strains, (galactose is not assimilated by *D. indicus*).

None of the strains utilized sorbose, raffinose, acetate, citrate, cysteine, lysine and methionine. (raffinose is assimilated by *D. indicus*).
