# Supplementary material
Source: PubMed Central journal article supplement (PMC1214641)
Supplement: aem_71_9_5225__2.pdf [file aem_71_9_5225__2.pdf]

Supplemental Table B. Hydrolysis of chromogenic substrates.

| Substrate                                | Strains                |                         |                         |          |          |           |           |           |           |          |          |          |          |           |           |           |           |           |          |           |
|------------------------------------------|------------------------|-------------------------|-------------------------|----------|----------|-----------|-----------|-----------|-----------|----------|----------|----------|----------|-----------|-----------|-----------|-----------|-----------|----------|-----------|
|                                          | D.<br>geo <sup>T</sup> | D.<br>murr <sup>T</sup> | D.<br>radd <sup>T</sup> | KR<br>40 | KR<br>88 | KR<br>245 | KR<br>114 | KR<br>140 | KR<br>125 | KR<br>36 | KR<br>55 | LB<br>34 | KR<br>23 | KR<br>235 | KR<br>242 | KR<br>236 | KR<br>119 | KR<br>241 | KR<br>87 | KR<br>136 |
| pNP-alpha-D-Glucopyranoside              | +                      | +                       | +                       | (-)      | (-)      | -         | -         | (-)       | -         | +        | +        | +        | +        | (-)       | -         | -         | +         | (-)       | -        | +         |
| pNP-beta-D-Glucopyranoside               | -                      | +                       | -                       | -        | -        | -         | -         | +         | +         | -        | +        | (-)      | -        | -         | -         | -         | (-)       | -         | -        | +         |
| oNP-beta-D-Glucopyranoside               | -                      | -                       | -                       | -        | -        | -         | -         | (-)       | -         | -        | +        | -        | -        | -         | -         | -         | -         | -         | -        | -         |
| pNP-alpha-D-Maltoside                    | +                      | +                       | -                       | -        | -        | -         | -         | -         | -         | -        | (-)      | +        | +        | -         | (-)       | -         | -         | -         | -        | (-)       |
| pNP-alpha-L-Rhamnoside                   | -                      | +                       | -                       | -        | -        | -         | -         | -         | -         | +        | -        | -        | -        | (-)       | +         | -         | -         | -         | -        | (-)       |
| pNP-beta-D-Xylopyranoside                | -                      | (-)                     | -                       | -        | -        | -         | -         | (-)       | +         | -        | -        | -        | -        | -         | -         | -         | -         | -         | -        | -         |
| L-Arginine p-Nitroanilide<br>acetate     | +                      | -                       | +                       | -        | -        | -         | -         | -         | -         | +        | -        | +        | -        | -         | -         | -         | -         | -         | -        | +         |
| L-Arginine p-Nitroanilide 2<br>HCl       | +                      | -                       | +                       | -        | -        | -         | -         | (-)       | +         | (-)      | -        | +        | +        | -         | (-)       | -         | -         | -         | +        | +         |
| L-Leucine p-Nitroanilide                 | +                      | +                       | +                       | -        | -        | -         | -         | -         | -         | -        | +        | +        | +        | -         | (-)       | +         | -         | -         | +        | +         |
| Glycine p-Nitroanilide                   | -                      | -                       | -                       | -        | -        | (-)       | -         | -         | -         | -        | +        | -        | -        | -         | -         | -         | -         | -         | +        | +         |
| L-Proline p-Nitroanilide                 | -                      | -                       | -                       | -        | -        | -         | -         | -         | -         | +        | +        | +        | -        | -         | -         | -         | -         | -         | +        | +         |
| pNP-bis-Phosphate Sodium<br>Salt         | +                      | +                       | +                       | -        | (-)      | (-)       | -         | -         | (-)       | (-)      | +        | +        | +        | -         | -         | -         | -         | +         | +        | +         |
| pNP-Phenyl-Phosphonate-<br>Ammonium Salt | -                      | +                       | +                       | -        | (-)      | -         | -         | -         | -         | -        | +        | +        | +        | -         | -         | -         | -         | -         | (-)      | -         |
| pNP-Phosphat tNa2-Salt                   | +                      | -                       | +                       | (-)      | -        | -         | -         | -         | (-)       | -        | +        | -        | -        | -         | (-)       | -         | -         | +         | +        | +         |
| pNP-Phosphorylcholine                    | -                      | -                       | -                       | -        | (-)      | -         | -         | -         | -         | -        | -        | -        | -        | -         | -         | -         | -         | -         | -        | -         |
| pNP-Thymidine-5'-<br>monophosphate-ster  | -                      | -                       | +                       | -        | -        | -         | -         | -         | -         | -        | (-)      | -        | -        | -         | -         | -         | -         | -         | (-)      | +         |

Reading after 24h of incubation, (+) weak positive, + positive, - negative, None of the strains hydrolyzed pNP-N-acetyl-beta-D-galactosaminide, pNP-beta-D-glucuronide, pNP-alpha-L-fucopyranoside, L-glutamate-Gamma-3-carboxy-pNA, pNP-N-acetyl-alpha-D-glucosaminide, pNP-N-acetyl-beta-D-glucosaminide, pNP-alpha-L-arabinopyranoside, pNP-beta-D-galactopyranoside, oNP-beta-D-galactopyranoside, pNP-alpha-D-mannopyranoside, pNP-beta-D-lactopyranoside and oNP-beta-D-xylopyranoside. (Strains KR 125 and KR 242 were inoculated from agar-plates, the remaining strains from liquid culture).
