# Supplementary material
Source: PubMed Central journal article supplement (PMC1214641)
Supplement: aem_71_9_5225__3.pdf [file aem_71_9_5225__3.pdf]

| Fatty Acids         | <i>Dhoh</i> <sup>c</sup> | <i>Dnov</i> <sup>c</sup> | <i>Dhop</i> <sup>c</sup> | <i>Dapa</i> <sup>c</sup> | <i>Dmar</i> <sup>c</sup> | <i>Dpim</i> <sup>c</sup> | <i>Dyav</i> <sup>c</sup> | <i>Dpap</i> <sup>c</sup> | <i>Dson</i> <sup>c</sup> |
|---------------------|--------------------------|--------------------------|--------------------------|--------------------------|--------------------------|--------------------------|--------------------------|--------------------------|--------------------------|
| 12:0 iso            | -                        | 0.7                      | -                        | 1.0                      | 1.6                      | 0.9                      | 1.9                      | 0.5                      | 3.4                      |
| 12:0                | -                        | -                        | -                        | -                        | -                        | -                        | -                        | -                        | -                        |
| 13:0 iso            | 0.5                      | 1.1                      | -                        | 4.4                      | 7.1                      | 9.6                      | 7.2                      | 1.4                      | 5.0                      |
| 13:0 anteiso        | -                        | -                        | -                        | 1.1                      | 0.7                      | 2.9                      | 5.2                      | -                        | 2.9                      |
| 13:0                | -                        | -                        | -                        | -                        | -                        | -                        | -                        | -                        | -                        |
| 14:0 iso            | -                        | -                        | -                        | 0.9                      | 3.1                      | 4.1                      | 2.5                      | 2.1                      | 0.9                      |
| 14:0                | 0.6                      | 1.1                      | 0.7                      | 0.6                      | -                        | 1.9                      | 1.3                      | 0.5                      | -                        |
| 15:1 iso F          | -                        | 1.0                      | -                        | -                        | -                        | -                        | -                        | -                        | -                        |
| 15:1 iso I          | -                        | -                        | -                        | 1.0                      | 4.1                      | 11.1                     | 1.9                      | 0.8                      | -                        |
| 15:0 iso            | 1.7                      | 3.6                      | -                        | 14.1                     | 31.9                     | 21.4                     | 24.5                     | 11.2                     | 0.9                      |
| 15:0 anteiso        | -                        | -                        | -                        | 1.4                      | 0.7                      | 4.8                      | 5.7                      | 5.6                      | 2.4                      |
| 15:1 ω8c            | 1.5                      | 3.6                      | -                        | -                        | -                        | -                        | -                        | 1.6                      | -                        |
| 15:1 ω6c            | 5.7                      | 6.9                      | 7.8                      | 7.2                      | 1.5                      | 1.1                      | 1.3                      | 8.8                      | 12.7                     |
| 15:0                | 5.3                      | 8.0                      | 5.6                      | 6.4                      | 2.8                      | 2.1                      | 3.8                      | 4.8                      | 10.3                     |
| Unknown 15.356      | 1.2                      | 1.3                      | 2.4                      | 0.6                      | 1.3                      | -                        | 1.3                      | 1.0                      | 1.0                      |
| 16:1 ω7t alcohol    | 0.6                      | 0.9                      | -                        | -                        | -                        | -                        | -                        | -                        | -                        |
| 16:1 iso H          | 1.7                      | 2.3                      | -                        | 1.8                      | -                        | 1.1                      | 0.5                      | 6.1                      | 4.6                      |
| 16:0 iso            | 3.6                      | 3.2                      | 2.1                      | 6.0                      | 8.7                      | 6.2                      | 5.7                      | 10.5                     | 12.5                     |
| 16:1 ω9c            | 2.2                      | 3.3                      | -                        | -                        | -                        | -                        | -                        | 1.8                      | -                        |
| 16:1 ω7c            | 19.0                     | 21.7                     | 51.1                     | 13.6                     | 4.3                      | 3.4                      | 5.7                      | 10.6                     | 13.1                     |
| 16:1 ω5c            | -                        | -                        | 1.9                      | -                        | -                        | 0.7                      | -                        | -                        | 0.8                      |
| 16:0                | 9.0                      | 9.1                      | 13.6                     | 7.2                      | 12.7                     | 6.6                      | 15.6                     | 6.9                      | 7.9                      |
| 17:1 ω9c iso        | 12.1                     | 11.6                     | -                        | 3.8                      | -                        | -                        | -                        | 6.0                      | 1.2                      |
| Peak A <sup>a</sup> | -                        | -                        | -                        | -                        | 1.7                      | 1.8                      | 1.0                      | 0.6                      | -                        |
| 17:1 ω9c anteiso    | 0.4                      | -                        | -                        | 0.7                      | -                        | -                        | -                        | -                        | 0.7                      |
| 17:0 iso            | 5.0                      | 2.8                      | -                        | 14.3                     | 13.8                     | 12.9                     | 7.4                      | 10.8                     | 7.2                      |
| 17:0 anteiso        | -                        | -                        | -                        | 6.0                      | -                        | 1.1                      | 1.4                      | 1.1                      | 0.7                      |
| 17:1 ω8c            | 15.0                     | 11.4                     | 1.3                      | 4.6                      | -                        | -                        | -                        | 7.2                      | 2.0                      |
| Unknown 16.833      | -                        | -                        | -                        | -                        | -                        | -                        | 1.0                      | -                        | -                        |
| 17:1 ω6c            | 2.3                      | 1.4                      | 5.8                      | 1.6                      | -                        | -                        | -                        | 1.6                      | 2.5                      |
| 17:0 cyclo          | -                        | 0.8                      | -                        | -                        | -                        | -                        | -                        | -                        | -                        |
| 17:0                | 6.5                      | 3.0                      | 5.7                      | 4.3                      | 1.2                      | -                        | 1.3                      | 2.6                      | 5.3                      |
| 16:0 iso 3OH        | -                        | -                        | -                        | -                        | -                        | 1.1                      | -                        | 0.6                      | -                        |
| 18:0 iso            | -                        | -                        | -                        | -                        | -                        | -                        | -                        | 1.1                      | 0.6                      |
| Unknown 17.654      | -                        | -                        | -                        | -                        | -                        | -                        | -                        | -                        | -                        |
| 18:1 ω9c            | -                        | -                        | -                        | -                        | -                        | 0.6                      | 1.2                      | -                        | -                        |
| 18:1 ω7c            | -                        | -                        | 1.4                      | -                        | -                        | -                        | -                        | -                        | -                        |
| 18:0                | 0.5                      | -                        | 0.7                      | -                        | -                        | -                        | 0.8                      | 0.5                      | -                        |
| 17:0 iso 3OH        | -                        | -                        | -                        | -                        | -                        | 4.5                      | -                        | 3.1                      | -                        |

*Dgeo*, *D. geothermalis*; *Dmur*, *D. murrayi*; *Dgra*, *D. grandis*; *Dpro*, *D. proteolyticus*; *Drdu*, *D. radiodurans*; *Drph*, *D. radiophilus*; *Drpu*, *D. radiopugnans*; *Dind*, *D. indicus*; *Dfri*, *D. frigans*; *Dsax*, *D. saxicola*; *Dmrm*, *D. marmoris*; *Dhoh*, *D. hohokamensis*; *Dnov*, *D. novajoensis*; *Dhop*, *D. hopiensis*; *Dapa*, *D. apachensis*; *Dmar*, *D. maricopensis*; *Dpim*, *D. pimensis*; *Dyav*, *D. yavapaiensis*; *Dpap*, *D. papagoensis*; *Dson*, *D. sonorensis*. <sup>a</sup>, this peak contains 17:1 iso I or 17:1 anteiso B; <sup>b</sup>, data from Ferreira *et al.* (19); <sup>c</sup>, our results; <sup>d</sup>, data from Hirsch *et al.* (26).
